# Supplementary material for: Consumer Perception of Carbon Labels on Cross-Border E-Commerce Products and its Influencing Factors: An Empirical Study in Hangzhou
Source: publisher site journal article supplement (doi:10.1515/econ-2025-0145), 2025-01-01
Supplement: Supplementary file 1 [file Data-Round-1-and-2.xlsx]

## Sheet: Round 1
Q1、Gender	Q2、Age	Q3、education	Q4、monthly income	Y1-1	Y1-2	Y1（CO）	Y2-1	Y2-2	Y2-3	Y2（TR）	Y3-1	Y3-2	Y3（AC）	Y（CP）	X1-1	X1-2	X1-3	X1-4	X1-5	X1-6	X1-7	X1	X2-1	X2-2	X2-3	X2-4	X2-5	X2-6	X2	X3-1	X3-2	X3-3	X3-4	X3-5	X3-6	X3	X4-1	X4-2	X4-3	X4-4	X4-5	X4-6	X4
1	2	2	2	4	3	3.5	4	4	5	4.33	4	5	4.5	4.11	5	4	4	4	4	4	5	4.28571	4	4	5	4	5	5	4.5	5	5	3	3	5	4	4.16667	4	5	3	5	5	5	4.5
1	1	1	1	1	1	1	1	2	1	1.33	2	1	1.5	1.28	2	3	2	3	2	2	2	2.28571	2	1	3	3	2	1	2	2	1	2	1	1	1	1.33333	1	2	1	2	1	1	1.33
2	5	1	1	1	1	1	1	1	1	1	2	1	1.5	1.17	1	1	1	2	2	1	2	1.42857	2	2	3	2	1	2	2	1	1	2	3	2	1	1.66667	2	1	2	1	2	1	1.5
2	5	1	1	1	1	1	1	1	3	1.67	1	1	1	1.22	1	2	1	1	1	3	1	1.42857	2	1	2	1	2	3	1.83	1	2	2	1	1	1	1.33333	1	2	2	2	2	1	1.67
1	2	4	2	3	4	3.5	4	4	4	4	4	4	4	3.83	5	5	4	3	5	4	5	4.42857	5	4	5	4	4	4	4.33	5	4	4	5	3	3	4	5	5	4	5	4	4	4.5
2	1	1	1	2	3	2.5	2	2	2	2	2	1	1.5	2	1	1	1	1	2	2	1	1.28571	2	2	1	2	2	2	1.83	1	1	1	3	1	3	1.66667	1	1	1	1	2	2	1.33
1	1	1	1	2	2	2	2	2	2	2	1	3	2	2	3	1	1	2	1	2	3	1.85714	1	2	1	1	1	2	1.33	1	2	2	1	2	1	1.5	1	3	2	1	1	1	1.5
2	1	1	1	3	1	2	2	1	2	1.67	2	2	2	1.89	2	2	1	2	1	1	1	1.42857	2	1	2	2	1	2	1.67	1	1	2	3	1	1	1.5	1	1	2	1	2	2	1.5
2	1	1	1	1	1	1	3	2	3	2.67	2	1	1.5	1.72	2	2	2	2	2	2	1	1.85714	2	1	2	1	3	1	1.67	2	2	2	1	3	1	1.83333	2	2	2	2	1	2	1.83
1	4	1	1	1	1	1	1	1	2	1.33	2	1	1.5	1.28	1	2	2	2	2	1	2	1.71429	1	1	1	2	3	2	1.67	2	1	1	1	2	2	1.5	1	2	2	3	1	1	1.67
2	5	1	1	2	1	1.5	1	2	1	1.33	2	1	1.5	1.44	1	2	3	2	2	2	2	2	1	1	2	2	2	1	1.5	1	3	2	1	1	2	1.66667	3	2	3	2	2	2	2.33
2	4	1	1	2	3	2.5	1	1	1	1	1	1	1	1.5	1	2	3	2	1	1	2	1.71429	1	2	3	1	1	1	1.5	2	2	2	2	2	1	1.83333	2	2	1	1	1	2	1.5
2	4	1	1	1	1	1	2	2	2	2	2	1	1.5	1.5	2	2	1	1	1	1	2	1.42857	2	2	3	2	1	1	1.83	2	2	2	2	2	1	1.83333	2	2	2	1	2	1	1.67
2	2	4	2	5	3	4	5	5	3	4.33	4	5	4.5	4.28	3	4	4	5	5	4	5	4.28571	5	5	4	3	3	5	4.17	3	4	5	4	5	5	4.33333	4	4	5	4	3	4	4
1	2	1	3	3	3	3	4	5	3	4	4	3	3.5	3.5	5	5	4	4	3	5	5	4.42857	5	5	5	5	5	5	5	5	4	5	5	5	4	4.66667	5	5	5	5	5	5	5
1	5	1	1	2	1	1.5	1	2	3	2	1	1	1	1.5	2	2	2	3	3	1	2	2.14286	2	1	1	1	2	2	1.5	2	1	2	3	1	1	1.66667	3	2	1	3	1	1	1.83
2	4	1	1	1	1	1	2	3	1	2	2	1	1.5	1.5	2	1	2	1	2	2	2	1.71429	1	2	2	2	2	2	1.83	2	2	1	1	1	2	1.5	1	2	2	2	1	2	1.67
1	5	1	1	1	1	1	2	2	3	2.33	1	2	1.5	1.61	2	1	2	1	1	2	2	1.57143	2	1	2	3	2	1	1.83	2	2	2	1	2	2	1.83333	2	1	1	2	2	1	1.5
2	5	1	1	2	1	1.5	3	2	1	2	2	1	1.5	1.67	2	3	2	2	2	2	2	2.14286	2	1	2	1	1	2	1.5	1	2	1	3	1	1	1.5	1	3	3	3	1	2	2.17
1	4	1	1	2	2	2	2	1	3	2	1	1	1	1.67	2	1	2	2	3	2	2	2	2	2	2	1	2	2	1.83	2	2	1	2	2	2	1.83333	3	2	3	1	1	2	2
2	2	1	2	5	5	5	5	5	5	5	5	4	4.5	4.83	4	4	5	3	5	4	4	4.14286	4	4	5	3	4	5	4.17	5	4	3	3	3	4	3.66667	5	5	5	4	4	4	4.5
1	4	1	1	1	2	1.5	1	2	1	1.33	3	2	2.5	1.78	2	3	1	3	3	1	3	2.28571	2	1	1	3	1	2	1.67	2	1	1	2	3	1	1.66667	2	2	2	1	2	2	1.83
1	5	1	1	2	2	2	1	2	1	1.33	2	2	2	1.78	2	1	2	2	1	2	2	1.71429	1	2	1	3	2	2	1.83	1	3	2	2	3	1	2	3	2	2	3	2	3	2.5
1	2	3	1	4	4	4	4	4	4	4	5	3	4	4	5	3	5	4	4	5	5	4.42857	5	3	4	4	5	4	4.17	4	5	4	4	5	4	4.33333	4	4	4	5	4	5	4.33
1	2	3	3	4	5	4.5	5	4	3	4	4	5	4.5	4.33	4	4	5	4	5	4	5	4.42857	4	4	4	5	4	3	4	3	4	5	5	5	4	4.33333	4	5	4	4	5	3	4.17
2	4	1	1	2	2	2	3	2	2	2.33	1	1	1	1.78	2	1	1	2	1	2	3	1.71429	2	3	2	1	1	3	2	2	3	2	1	2	1	1.83333	3	1	1	2	2	1	1.67
1	5	1	1	1	2	1.5	1	2	3	2	2	2	2	1.83	1	2	2	3	2	1	3	2	3	2	1	2	3	1	2	1	3	2	2	1	2	1.83333	2	2	2	2	2	2	2
2	4	1	1	2	1	1.5	1	2	2	1.67	2	3	2.5	1.89	2	1	1	2	3	2	2	1.85714	2	1	1	2	2	2	1.67	3	2	2	3	2	1	2.16667	2	2	1	2	1	1	1.5
1	5	1	1	2	2	2	2	1	2	1.67	2	2	2	1.89	2	1	1	2	2	2	2	1.71429	3	2	2	2	2	2	2.17	2	2	2	2	3	2	2.16667	1	3	2	1	2	2	1.83
2	2	1	2	4	5	4.5	5	5	5	5	4	4	4	4.5	5	3	4	4	4	5	5	4.28571	5	5	4	3	5	5	4.5	5	3	4	4	5	4	4.16667	5	5	4	4	3	4	4.17
2	5	3	2	5	4	4.5	3	3	4	3.33	3	4	3.5	3.78	4	5	4	4	5	5	5	4.57143	3	5	5	5	4	5	4.5	4	4	5	4	5	4	4.33333	3	4	5	5	4	5	4.33
1	1	1	1	2	2	2	1	1	1	1	2	2	2	1.67	2	1	1	2	1	3	2	1.71429	1	1	2	3	2	1	1.67	1	1	2	1	2	2	1.5	1	1	2	1	2	2	1.5
2	5	3	2	4	4	4	4	3	4	3.67	4	4	4	3.89	5	5	4	3	4	4	3	4	5	5	5	5	4	5	4.83	4	5	3	5	5	5	4.5	4	3	5	5	5	5	4.5
2	4	2	2	4	4	4	4	4	4	4	4	4	4	4	5	3	4	5	4	5	4	4.28571	4	5	4	5	4	5	4.5	5	5	4	5	5	3	4.5	3	4	4	5	5	4	4.17
2	4	1	2	5	4	4.5	3	5	4	4	4	3	3.5	4	3	5	5	3	3	4	3	3.71429	3	4	3	5	3	4	3.67	5	4	5	5	4	4	4.5	5	4	4	4	4	4	4.17
2	5	3	1	5	3	4	3	5	4	4	4	4	4	4	4	5	3	5	4	5	5	4.42857	4	5	4	4	4	5	4.33	5	4	5	5	4	3	4.33333	3	5	4	4	5	5	4.33
2	4	1	1	4	5	4.5	4	3	4	3.67	3	5	4	4.06	5	4	4	4	5	4	5	4.42857	5	4	5	5	5	5	4.83	4	4	5	5	3	4	4.16667	4	4	5	4	4	5	4.33
2	4	2	2	3	5	4	5	4	4	4.33	4	4	4	4.11	5	5	5	4	4	3	3	4.14286	5	5	5	5	5	5	5	4	4	3	5	4	4	4	4	3	4	5	5	4	4.17
2	5	1	3	5	3	4	5	4	3	4	4	5	4.5	4.17	5	3	4	5	5	5	3	4.28571	4	4	5	3	4	3	3.83	5	5	3	5	5	4	4.5	4	4	5	4	4	5	4.33
2	2	4	1	3	5	4	4	3	3	3.33	3	5	4	3.78	4	5	5	4	5	5	4	4.57143	5	4	5	5	4	4	4.5	4	5	4	5	4	5	4.5	4	4	4	4	3	5	4
2	5	1	1	5	4	4.5	4	4	3	3.67	4	5	4.5	4.22	3	4	4	5	4	4	4	4	5	3	5	5	5	4	4.5	5	5	4	4	4	5	4.5	5	4	5	4	3	4	4.17
2	5	3	3	4	5	4.5	4	5	5	4.67	3	4	3.5	4.22	4	5	4	4	4	5	5	4.42857	4	5	4	5	3	5	4.33	5	4	4	3	4	5	4.16667	4	4	5	4	5	4	4.33
2	4	2	3	4	4	4	5	4	4	4.33	5	4	4.5	4.28	4	4	4	5	4	4	5	4.28571	5	4	5	3	4	5	4.33	5	5	4	4	4	5	4.5	5	3	5	5	4	5	4.5
2	4	2	1	3	5	4	3	5	5	4.33	5	4	4.5	4.28	5	5	3	5	5	5	5	4.71429	5	4	5	4	4	4	4.33	3	4	5	5	3	3	3.83333	5	5	5	5	4	5	4.83
2	4	3	1	5	4	4.5	4	5	4	4.33	4	4	4	4.28	4	5	5	4	4	5	5	4.57143	5	5	5	4	4	5	4.67	5	5	5	3	4	5	4.5	5	3	5	5	5	5	4.67
1	2	2	1	5	5	5	5	4	4	4.33	4	5	4.5	4.61	5	4	5	5	4	3	5	4.42857	5	5	3	5	4	4	4.33	5	5	4	5	5	5	4.83333	5	4	3	5	4	5	4.33
2	2	2	2	4	4	4	4	4	5	4.33	4	5	4.5	4.28	5	5	4	4	5	5	4	4.57143	3	5	4	4	5	4	4.17	4	5	4	5	5	3	4.33333	4	3	3	3	5	5	3.83
2	3	2	2	5	5	5	3	5	4	4	4	4	4	4.33	5	5	5	5	4	5	5	4.85714	4	5	4	4	3	4	4	3	5	5	3	4	5	4.16667	4	4	4	3	3	4	3.67
2	4	3	3	5	4	4.5	5	3	4	4	4	5	4.5	4.33	5	5	4	5	5	5	5	4.85714	4	4	3	4	4	4	3.83	4	5	5	5	3	4	4.33333	5	5	5	5	4	5	4.83
1	2	4	2	4	5	4.5	5	5	4	4.67	3	4	3.5	4.22	5	4	4	4	4	4	4	4.14286	4	5	5	5	4	5	4.67	5	5	5	4	3	5	4.5	3	5	5	4	5	5	4.5
2	3	3	3	4	5	4.5	4	4	4	4	5	4	4.5	4.33	4	4	4	4	3	5	5	4.14286	5	4	5	4	4	4	4.33	5	3	5	4	4	4	4.16667	4	4	4	4	4	4	4
2	4	2	1	3	5	4	5	5	4	4.67	5	4	4.5	4.39	5	4	4	5	5	5	4	4.57143	4	5	4	4	4	4	4.17	5	3	5	5	5	5	4.66667	4	5	5	5	3	3	4.17
2	5	1	3	4	4	4	5	5	4	4.67	4	5	4.5	4.39	5	5	4	3	5	5	5	4.57143	5	5	4	5	5	5	4.83	4	4	4	3	4	3	3.66667	3	5	5	5	5	4	4.5
2	4	1	2	4	5	4.5	5	5	4	4.67	4	4	4	4.39	5	4	4	4	5	4	4	4.28571	4	4	5	4	4	3	4	4	5	3	4	4	3	3.83333	5	5	5	5	4	4	4.67
2	5	1	3	5	4	4.5	5	5	3	4.33	4	5	4.5	4.44	5	5	4	4	4	5	4	4.42857	5	4	5	5	4	5	4.67	4	5	5	4	5	5	4.66667	5	5	3	5	5	5	4.67
2	3	3	2	3	5	4	4	4	5	4.33	5	5	5	4.44	4	3	5	5	4	5	4	4.28571	4	5	4	5	3	4	4.17	3	5	3	5	5	5	4.33333	3	4	5	4	4	4	4
2	2	3	1	5	4	4.5	4	5	5	4.67	5	4	4.5	4.56	4	5	4	4	4	4	3	4	4	4	5	4	5	4	4.33	3	4	5	4	3	3	3.66667	5	4	5	4	4	5	4.5
2	5	2	3	5	5	5	4	5	4	4.33	4	4	4	4.44	5	5	4	5	5	4	5	4.71429	3	5	4	3	3	4	3.67	3	5	4	4	4	4	4	5	5	5	4	5	3	4.5
2	3	3	2	5	5	5	4	5	4	4.33	5	3	4	4.44	4	5	5	5	4	4	4	4.42857	3	5	4	5	5	4	4.33	5	5	5	4	3	5	4.5	5	5	4	5	3	5	4.5
1	2	3	3	4	5	4.5	4	4	4	4	3	3	3	3.83	5	5	5	5	4	5	3	4.57143	5	4	3	4	4	5	4.17	4	5	4	5	5	5	4.66667	5	5	4	5	3	5	4.5
1	2	3	3	4	4	4	4	5	4	4.33	3	5	4	4.11	4	5	5	5	4	4	5	4.57143	5	5	5	5	5	4	4.83	5	3	5	4	5	5	4.5	3	4	5	5	5	4	4.33
1	2	2	2	5	4	4.5	5	4	4	4.33	5	3	4	4.28	4	4	5	4	5	3	3	4	3	5	5	4	5	4	4.33	5	5	5	5	4	5	4.83333	4	3	4	4	5	5	4.17
1	1	1	1	1	2	1.5	2	1	1	1.33	2	3	2.5	1.78	1	1	1	2	2	3	1	1.57143	2	2	1	1	1	1	1.33	1	1	2	2	3	2	1.83333	2	2	1	1	1	2	1.5
1	2	2	1	5	3	4	5	4	4	4.33	5	4	4.5	4.28	5	4	4	5	4	5	4	4.42857	5	5	3	3	3	4	3.83	3	3	5	5	4	5	4.16667	5	3	5	4	5	5	4.5
2	4	4	2	4	5	4.5	4	4	5	4.33	5	4	4.5	4.44	4	4	5	5	4	4	5	4.42857	5	5	3	5	5	5	4.67	5	3	4	5	5	4	4.33333	4	4	4	4	5	5	4.33
2	3	1	3	4	5	4.5	4	4	5	4.33	5	4	4.5	4.44	4	5	4	3	5	4	4	4.14286	5	5	3	5	5	4	4.5	5	4	4	4	4	4	4.16667	5	5	4	5	5	5	4.83
2	4	2	1	5	4	4.5	4	4	5	4.33	4	5	4.5	4.44	5	4	3	4	4	5	4	4.14286	4	5	4	3	5	4	4.17	5	5	4	3	5	5	4.5	5	4	4	3	4	4	4
2	1	1	1	2	1	1.5	2	1	2	1.67	3	1	2	1.72	1	1	2	1	2	1	1	1.28571	1	2	2	3	3	1	2	1	1	2	2	2	1	1.5	1	2	1	2	1	1	1.33
2	5	1	1	4	4	4	5	5	5	5	4	5	4.5	4.5	5	4	5	4	5	5	4	4.57143	3	5	4	4	5	5	4.33	5	4	5	5	5	3	4.5	4	4	3	5	4	5	4.17
1	2	3	2	5	5	5	5	4	4	4.33	5	5	5	4.78	3	5	5	3	5	3	4	4	4	4	4	5	4	5	4.33	5	4	4	5	3	5	4.33333	4	3	4	5	5	4	4.17
2	2	2	1	3	4	3.5	5	5	5	5	5	3	4	4.17	5	4	3	5	4	4	4	4.14286	3	5	5	5	5	4	4.5	5	5	5	4	5	5	4.83333	5	3	4	4	4	5	4.17
1	1	1	1	2	2	2	2	2	2	2	1	1	1	1.67	2	1	1	3	1	3	3	2	3	3	1	1	1	2	1.83	3	2	1	2	1	2	1.83333	1	1	1	2	1	2	1.33
2	5	1	3	4	4	4	5	5	5	5	5	4	4.5	4.5	3	5	5	4	4	5	5	4.42857	3	4	4	4	5	4	4	4	4	5	4	4	4	4.16667	4	5	4	5	4	4	4.33
2	2	1	2	3	4	3.5	5	5	5	5	3	3	3	3.83	3	5	5	5	5	5	5	4.71429	4	4	4	5	5	4	4.33	4	4	4	5	5	3	4.16667	4	5	4	4	5	4	4.33
2	4	4	3	5	4	4.5	5	4	5	4.67	4	5	4.5	4.56	5	4	4	4	3	3	4	3.85714	3	5	5	5	4	5	4.5	5	5	5	4	5	5	4.83333	4	4	4	4	5	3	4
2	4	1	2	5	4	4.5	5	4	4	4.33	5	5	5	4.61	5	5	4	5	4	4	5	4.57143	4	5	5	4	4	4	4.33	4	4	5	3	4	5	4.16667	5	5	4	5	4	4	4.5
2	5	3	1	5	5	5	5	5	5	5	4	4	4	4.67	5	5	5	4	4	4	4	4.42857	5	4	4	3	4	5	4.17	3	5	5	4	5	4	4.33333	4	4	5	4	5	4	4.33
2	3	4	3	4	5	4.5	5	5	4	4.67	5	5	5	4.72	4	5	5	5	5	4	4	4.57143	4	5	5	4	4	5	4.5	3	4	4	5	3	5	4	4	4	5	4	5	4	4.33
2	3	2	2	5	5	5	5	4	5	4.67	5	4	4.5	4.72	5	3	4	5	4	5	5	4.42857	4	5	5	3	5	4	4.33	4	4	4	3	4	4	3.83333	4	4	3	5	3	4	3.83
2	3	3	1	5	5	5	5	4	5	4.67	5	5	5	4.89	5	3	4	5	4	5	4	4.28571	4	4	5	4	5	5	4.5	3	3	5	5	5	5	4.33333	4	5	5	4	5	3	4.33
2	3	4	1	4	3	3.5	4	5	4	4.33	4	4	4	3.94	4	4	5	3	5	4	4	4.14286	5	4	4	5	5	4	4.5	5	4	4	4	4	5	4.33333	5	5	4	4	4	3	4.17
1	3	3	2	3	5	4	5	5	3	4.33	4	3	3.5	3.94	3	5	3	4	4	4	4	3.85714	4	4	4	4	3	5	4	5	5	5	5	5	5	5	4	3	5	4	5	4	4.17
2	3	3	2	4	5	4.5	4	4	3	3.67	4	4	4	4.06	4	4	5	4	4	4	5	4.28571	5	4	5	3	3	4	4	4	4	3	5	5	4	4.16667	5	4	4	4	4	5	4.33
1	3	3	2	4	5	4.5	4	4	5	4.33	3	4	3.5	4.11	5	4	5	4	5	3	3	4.14286	5	5	3	4	5	4	4.33	4	4	4	4	4	5	4.16667	5	5	3	5	4	4	4.33
1	3	4	3	4	4	4	5	3	5	4.33	4	4	4	4.11	5	5	5	5	4	3	4	4.42857	3	5	4	3	4	5	4	5	5	3	5	4	5	4.5	5	5	5	4	4	5	4.67
1	3	3	2	5	3	4	4	4	5	4.33	5	3	4	4.11	3	4	4	5	4	4	5	4.14286	4	4	4	4	4	4	4	5	4	4	5	5	4	4.5	5	5	4	4	4	5	4.5
1	3	1	1	4	4	4	4	5	4	4.33	4	4	4	4.11	5	4	5	5	5	5	5	4.85714	5	4	5	4	4	5	4.5	3	5	5	5	4	5	4.5	4	5	5	4	4	5	4.5
2	3	3	1	4	4	4	3	4	5	4	4	5	4.5	4.17	4	4	5	5	4	4	4	4.28571	5	5	3	5	4	5	4.5	4	4	4	4	3	4	3.83333	4	5	5	5	5	4	4.67
1	2	1	3	5	4	4.5	5	5	5	5	4	4	4	4.5	5	5	4	5	5	5	4	4.71429	5	5	5	3	4	5	4.5	5	4	5	3	4	4	4.16667	5	4	4	5	5	5	4.67
2	2	3	2	5	5	5	3	4	5	4	4	3	3.5	4.17	4	4	4	5	5	5	3	4.28571	5	4	5	5	4	4	4.5	4	4	5	4	4	5	4.33333	4	5	4	5	4	5	4.5
2	2	1	1	5	4	4.5	4	5	4	4.33	3	5	4	4.28	4	3	4	5	4	4	3	3.85714	3	5	5	4	3	3	3.83	5	5	3	4	4	3	4	5	3	4	3	4	5	4
2	3	3	1	5	3	4	5	4	4	4.33	5	4	4.5	4.28	5	4	5	4	4	3	4	4.14286	4	4	5	5	4	5	4.5	5	5	4	4	3	4	4.16667	3	5	5	5	5	5	4.67
2	3	1	3	4	5	4.5	5	4	4	4.33	4	4	4	4.28	5	5	5	4	4	3	4	4.28571	4	4	5	4	4	5	4.33	5	4	5	4	5	5	4.66667	5	5	5	5	5	5	5
1	3	1	3	4	4	4	4	5	4	4.33	4	5	4.5	4.28	5	4	4	4	4	5	4	4.28571	3	5	4	5	4	4	4.17	4	4	4	4	3	4	3.83333	4	5	4	4	4	5	4.33
2	1	1	1	2	1	1.5	3	2	1	2	1	1	1	1.5	2	2	3	2	2	1	1	1.85714	2	2	2	2	2	1	1.83	2	1	2	3	1	1	1.66667	2	1	2	2	3	2	2
1	3	3	3	4	4	4	4	5	4	4.33	5	4	4.5	4.28	4	5	4	4	4	4	4	4.14286	4	5	5	5	4	4	4.5	5	4	5	4	5	5	4.66667	5	4	4	3	4	5	4.17
1	1	1	1	2	2	2	2	1	1	1.33	3	1	2	1.78	1	2	1	2	3	2	2	1.85714	1	2	1	2	2	2	1.67	2	1	2	1	1	1	1.33333	1	2	1	2	1	2	1.5
1	3	1	2	4	5	4.5	4	3	5	4	5	4	4.5	4.33	5	5	5	4	5	4	5	4.71429	5	5	5	3	5	4	4.5	4	5	5	4	5	4	4.5	5	5	5	4	5	4	4.67
1	3	3	3	5	3	4	5	4	5	4.67	5	4	4.5	4.39	4	5	5	4	4	5	4	4.42857	5	5	3	4	4	4	4.17	5	5	4	3	4	5	4.33333	3	5	5	4	5	4	4.33
1	1	1	1	1	3	2	1	2	2	1.67	1	2	1.5	1.72	2	2	1	2	1	3	2	1.85714	3	1	2	3	2	1	2	2	2	3	2	2	2	2.16667	1	2	3	1	1	2	1.67
2	2	4	3	4	4	4	4	3	3	3.33	3	3	3	3.44	4	4	3	5	4	3	3	3.71429	5	4	5	4	5	4	4.5	5	4	5	4	4	5	4.5	4	5	5	5	5	5	4.83
2	3	1	2	4	4	4	5	4	4	4.33	5	5	5	4.44	4	5	4	4	5	5	4	4.42857	5	5	3	5	5	4	4.5	4	4	5	3	5	4	4.16667	4	4	4	5	5	5	4.5
1	2	2	1	3	3	3	5	5	5	5	5	3	4	4	5	5	5	4	5	4	5	4.71429	4	5	4	5	4	5	4.5	4	4	5	4	5	4	4.33333	4	4	5	3	4	5	4.17
1	2	2	3	5	5	5	5	3	4	4	5	4	4.5	4.5	4	4	5	5	5	4	4	4.42857	5	4	5	5	4	5	4.67	4	4	4	5	3	4	4	5	5	4	4	4	5	4.5
1	2	2	3	5	4	4.5	5	5	4	4.67	5	4	4.5	4.56	4	5	5	5	5	5	4	4.71429	3	5	3	4	5	4	4	4	5	3	3	4	4	3.83333	5	5	5	5	5	4	4.83
1	3	3	1	5	5	5	5	3	5	4.33	4	4	4	4.44	4	4	5	5	5	5	5	4.71429	4	4	5	3	5	3	4	4	3	4	4	4	3	3.66667	5	3	5	3	4	5	4.17
2	1	1	1	2	2	2	1	1	2	1.33	1	2	1.5	1.61	2	2	1	1	2	3	1	1.71429	2	1	1	1	2	1	1.33	2	3	1	2	1	1	1.66667	1	3	1	1	2	3	1.83
2	2	2	1	4	3	3.5	5	5	4	4.67	5	4	4.5	4.22	5	3	5	4	4	4	3	4	4	5	4	5	5	4	4.5	4	4	5	5	4	5	4.5	3	5	5	5	5	5	4.67
1	3	4	3	4	5	4.5	4	5	4	4.33	4	5	4.5	4.44	5	4	5	5	5	4	4	4.57143	5	3	4	5	3	3	3.83	5	5	5	5	5	5	5	5	4	4	4	3	4	4
1	1	1	1	3	1	2	2	2	1	1.67	2	2	2	1.89	2	2	1	2	1	1	2	1.57143	3	1	1	2	2	3	2	3	2	1	3	2	2	2.16667	1	3	2	1	2	1	1.67
2	1	1	1	2	2	2	2	2	2	2	3	3	3	2.33	3	2	3	1	2	2	1	2	1	1	3	2	1	1	1.5	2	2	2	3	2	1	2	1	1	2	1	2	2	1.5
2	2	3	2	4	4	4	5	4	5	4.67	4	4	4	4.22	5	5	3	5	3	4	5	4.28571	5	5	4	4	4	5	4.5	3	5	5	5	4	3	4.16667	5	4	5	4	3	5	4.33
2	2	2	1	4	5	4.5	5	5	5	5	4	5	4.5	4.67	5	4	4	4	3	5	4	4.14286	5	3	4	5	5	3	4.17	5	4	4	4	4	4	4.16667	3	5	5	5	5	3	4.33
1	3	3	3	4	5	4.5	3	4	5	4	5	5	5	4.5	4	5	5	5	4	5	4	4.57143	5	4	4	4	4	5	4.33	5	3	4	3	4	5	4	4	5	3	5	5	4	4.33
2	3	4	1	5	4	4.5	5	5	3	4.33	5	5	5	4.61	4	4	4	5	5	4	3	4.14286	4	4	3	4	5	5	4.17	4	5	4	5	5	4	4.5	4	3	5	5	5	5	4.5
1	2	2	3	3	5	4	3	3	4	3.33	4	5	4.5	3.94	3	4	3	3	4	3	5	3.57143	4	4	4	4	3	3	3.67	5	4	4	4	5	4	4.33333	3	4	3	4	5	3	3.67
1	3	2	3	4	5	4.5	3	5	5	4.33	5	5	5	4.61	5	5	5	4	5	3	5	4.57143	4	5	5	4	5	4	4.5	4	4	5	3	4	3	3.83333	5	5	5	4	3	4	4.33
1	3	3	2	5	4	4.5	4	5	4	4.33	5	5	5	4.61	4	4	4	4	5	5	4	4.28571	4	4	4	5	5	4	4.33	5	5	5	5	5	4	4.83333	4	4	4	4	4	5	4.17
1	3	2	1	4	5	4.5	4	4	5	4.33	5	5	5	4.61	4	5	4	5	4	5	5	4.57143	4	4	4	5	4	5	4.33	4	5	5	5	4	4	4.5	3	3	5	4	5	5	4.17
2	3	3	2	4	5	4.5	5	4	5	4.67	5	5	5	4.72	3	5	4	5	4	4	5	4.28571	4	4	5	4	4	4	4.17	4	5	5	5	5	4	4.66667	5	5	5	4	5	5	4.83
1	2	2	2	4	5	4.5	5	4	5	4.67	4	4	4	4.39	5	5	5	4	4	5	5	4.71429	5	5	4	5	5	3	4.5	4	4	4	5	4	5	4.33333	3	4	4	4	4	4	3.83
2	3	2	1	5	4	4.5	5	5	5	5	5	5	5	4.83	3	5	5	5	5	4	4	4.42857	4	4	4	5	5	4	4.33	4	5	4	4	5	5	4.5	5	4	4	5	5	4	4.5
2	2	1	2	4	5	4.5	4	5	4	4.33	5	5	5	4.61	5	4	3	5	5	4	5	4.42857	5	3	4	4	4	5	4.17	5	3	4	4	4	3	3.83333	4	5	5	4	4	5	4.5
2	3	2	1	5	5	5	5	4	5	4.67	5	5	5	4.89	4	4	5	5	4	5	5	4.57143	4	5	5	5	4	4	4.5	4	4	4	4	5	4	4.16667	3	5	4	4	4	3	3.83
1	2	4	2	4	5	4.5	4	3	5	4	5	5	5	4.5	5	3	4	4	4	3	5	4	5	3	4	5	5	4	4.33	4	4	4	4	4	5	4.16667	4	5	4	3	5	5	4.33

## Sheet: Round 2
X1	X2	X3	X4	Y1	Y2	Y3	Y
4	4	5	5	4	4	5	4.33
2	1	2	1	1	1	2	1.33
2	2	2	2	2	1	3	2
5	5	5	5	5	4	5	4.67
4	4	5	4	4	4	4	4
1	2	2	2	3	2	2	2.33
2	1	2	1	2	2	2	2
2	1	2	2	2	2	2	2
2	2	2	2	1	3	2	2
2	2	2	1	2	2	3	2.33
4	4	5	4	5	5	5	5
4	5	4	4	5	4	5	4.67
5	5	4	4	4	5	5	4.67
4	4	5	4	4	4	5	4.33
5	5	5	5	3	4	4	3.67
4	4	5	5	4	4	4	4
5	4	5	5	5	5	5	5
4	4	5	4	5	4	4	4.33
5	4	5	4	5	4	5	4.67
4	4	4	5	4	4	5	4.33
4	4	4	4	5	5	5	5
4	4	5	5	5	5	4	4.67
5	4	4	5	4	4	5	4.33
4	4	4	5	4	4	4	4
5	4	4	4	5	4	5	4.67
4	4	4	4	4	4	5	4.33
4	5	5	5	4	4	5	4.33
5	4	4	5	5	4	5	4.67
4	4	4	5	5	5	4	4.67
4	4	5	4	5	5	4	4.67
2	1	2	2	2	2	2	2
2	1	2	2	2	1	2	1.67
4	4	4	4	5	4	4	4.33
5	4	5	5	4	4	5	4.33
5	5	4	4	5	4	4	4.33
1	1	2	2	1	2	1	1.33
5	4	4	4	4	5	5	4.67
4	4	5	4	5	5	5	5
2	2	2	1	3	1	1	1.67
5	4	5	4	4	3	4	3.67
4	4	5	5	4	4	4	4
2	2	2	2	1	2	2	1.67
4	5	4	4	5	4	4	4.33
5	4	5	5	5	4	5	4.67
4	4	5	4	5	4	5	4.67
5	5	4	4	5	4	5	4.67
4	4	4	4	4	4	5	4.33
4	4	4	4	4	5	5	4.67
4	5	5	5	5	4	4	4.33
4	4	5	5	5	5	4	4.67
2	2	2	2	2	2	1	1.67
2	2	2	3	2	1	2	1.67
5	4	4	4	5	4	4	4.33
4	4	4	5	4	5	5	4.67
4	4	5	5	4	4	4	4
4	5	4	4	5	5	5	5
4	4	4	5	5	5	5	5
5	4	4	5	5	4	5	4.67
4	5	4	4	5	4	5	4.67
5	5	4	4	5	4	3	4
5	4	5	5	4	4	4	4
4	5	4	5	5	4	4	4.33
1	2	2	1	2	1	3	2
4	4	4	5	4	4	5	4.33
5	4	5	5	5	4	4	4.33
5	4	5	5	4	5	5	4.67
5	4	4	5	4	4	4	4
2	1	1	1	2	2	2	2
5	5	5	5	5	4	5	4.67
4	4	4	5	5	4	5	4.67
4	5	4	4	4	5	4	4.33
1	2	3	2	2	2	1	1.67
5	4	4	4	4	4	4	4
5	4	4	4	4	5	3	4
4	4	4	5	5	4	5	4.67
4	4	4	5	5	5	4	4.67
5	4	5	4	5	4	5	4.67
5	4	4	5	4	4	5	4.33
4	4	5	5	5	3	4	4
5	4	4	4	5	4	5	4.67
2	2	2	2	2	1	2	1.67
5	5	4	5	5	5	5	5
5	5	4	5	5	4	4	4.33
5	5	4	5	4	4	4	4
2	1	1	2	1	1	2	1.33
4	4	5	4	5	4	4	4.33
5	4	5	4	5	5	5	5
2	2	2	2	2	2	2	2
4	4	5	5	5	5	4	4.67
5	4	4	5	5	4	4	4.33
4	4	4	4	5	4	4	4.33
4	5	4	5	5	5	5	5
5	4	4	5	4	4	5	4.33
4	5	4	4	4	4	4	4
2	2	2	2	2	2	1	1.67
4	4	4	4	5	4	4	4.33
2	1	2	2	2	1	2	1.67
5	4	5	5	4	4	4	4
2	2	2	2	1	2	2	1.67
2	2	2	2	2	2	2	2
4	4	4	5	4	3	3	3.33
1	2	3	2	2	2	1	1.67
5	4	5	4	3	5	4	4
5	4	5	4	5	4	5	4.67
5	4	4	5	5	5	5	5
4	4	4	4	4	4	5	4.33
2	2	2	2	2	1	2	1.67
5	4	4	5	4	5	5	4.67
2	2	2	2	2	2	1	1.67
2	2	2	2	2	2	2	2
2	2	2	2	2	2	3	2.33
4	4	5	4	4	5	4	4.33
4	4	4	5	5	5	5	5
2	2	2	2	2	2	2	2
4	5	4	4	5	4	5	4.67
4	4	4	4	4	3	5	4
5	5	4	4	5	4	5	4.67
4	4	5	5	5	4	5	4.67
4	5	4	5	4	4	4	4
2	1	2	2	1	2	2	1.67
5	4	5	4	5	5	4	4.67
1	2	2	2	1	1	2	1.33
4	4	4	5	5	4	5	4.67
4	5	4	4	4	4	5	4.33
4	4	4	4	5	4	5	4.67

## Sheet: Round 1-2 T test-Y
Y-R1	Y-R2
4.11111	4.33
1.27778	1.33
1.77778	2
4.44444	4.67
3.83333	4
2	2.33
2	2
1.88889	2
1.72222	2
1.88889	2.33
4.88889	5
4.22222	4.67
4.38889	4.67
4.27778	4.33
3.5	3.67
3.88889	4
4.72222	5
4.33333	4.33
4.61111	4.67
4.16667	4.33
4.83333	5
4.22222	4.67
4.44444	4.33
4	4
4.33333	4.67
4.44444	4.33
4.27778	4.33
4.33333	4.67
4.66667	4.67
4.5	4.67
1.66667	2
1.66667	1.67
4.44444	4.33
4.27778	4.33
4.44444	4.33
1.22222	1.33
4.5	4.67
4.72222	5
1.5	1.67
3.77778	3.67
4	4
1.5	1.67
4	4.33
4.44444	4.67
4.33333	4.67
4.61111	4.67
4.27778	4.33
4.5	4.67
4.27778	4.33
4.22222	4.67
1.5	1.67
1.77778	1.67
4.11111	4.33
4.38889	4.67
4	4
4.55556	5
4.55556	5
4.44444	4.67
4.44444	4.67
3.83333	4
4.11111	4
4.27778	4.33
1.77778	2
4.27778	4.33
4.05556	4.33
4.38889	4.67
4.11111	4
1.72222	2
4.33333	4.67
4.77778	4.67
4.16667	4.33
1.66667	1.67
3.94444	4
3.83333	4
4.61111	4.67
4.38889	4.67
4.5	4.67
4.27778	4.33
3.77778	4
4.61111	4.67
1.44444	1.67
4.83333	5
4.27778	4.33
4.11111	4
1.27778	1.33
4.05556	4.33
4.88889	5
1.88889	2
4.5	4.67
4.16667	4.33
4.27778	4.33
4.72222	5
4.16667	4.33
4.11111	4
1.5	1.67
4.44444	4.33
1.77778	1.67
4.11111	4
1.61111	1.67
1.72222	2
3.44444	3.33
1.77778	1.67
4	4
4.5	4.67
4.55556	5
4.27778	4.33
1.61111	1.67
4.22222	4.67
1.66667	1.67
1.88889	2
2.33333	2.33
4.22222	4.33
4.66667	5
1.83333	2
4.61111	4.67
3.94444	4
4.44444	4.67
4.61111	4.67
3.94444	4
1.5	1.67
4.38889	4.67
1.16667	1.33
4.61111	4.67
4.27778	4.33
4.5	4.67
